# Supplementary material
Source: Springer Nature journal article supplement (https://www.springermedizin.de/resource/supplementary/12916_2013_1090_MOESM4_ESM.pdf/9598400)
Supplement: MOESM4 [file 9598400]

**Table 2. Changes in N-QoL scores after 12 weeks treatment with prosultiamine**

|                                                   | Pretreatment       | Posttreatment      | P <sup>***</sup> |
|---------------------------------------------------|--------------------|--------------------|------------------|
| Q1 Concentration                                  | 0.6 ± 1.0          | 0.3 ± 1.6          | 0.1235           |
| Q2 Low in energy                                  | 0.9 ± 1.1          | 0.4 ± 0.6          | 0.0077           |
| Q3 Sleep during the day                           | 1.5 ± 1.4          | 1.0 ± 1.1          | 0.0229           |
| Q4 Productiveness                                 | 0.7 ± 0.9          | 0.3 ± 0.6          | 0.0830           |
| Q5 Physical activities                            | 1.0 ± 1.2          | 0.5 ± 0.8          | 0.0505           |
| Q6 Fluid restriction                              | 0.8 ± 1.2          | 0.7 ± 0.9          | 0.3270           |
| Q7 Inadequate sleep at night                      | 1.6 ± 1.5          | 0.7 ± 1.0          | 0.0070           |
| Q8 Disturbance of others                          | 0.8 ± 1.9          | 0.5 ± 1.8          | 0.0277           |
| Q9 Preoccupation with waking at night             | 0.6 ± 1.1          | 0.3 ± 0.6          | 0.1235           |
| Q10 Worry over condition worsened                 | 1.5 ± 1.5          | 0.8 ± 1.1          | 0.0032           |
| Q11 Worried over treatment options                | 1.5 ± 1.6          | 1.0 ± 1.3          | 0.0303           |
| Q12 Overall bother                                | 1.3 ± 1.3          | 0.8 ± 0.8          | 0.0238           |
| Q13 Overall impact on everyday life               | 2.6 ± 2.8          | 0.9 ± 1.0          | 0.0023           |
| <b>Converted Overall Score(Q1-12)<sup>*</sup></b> | <b>73.2 ± 21.0</b> | <b>85.3 ± 19.9</b> | <b>0.0001</b>    |
| <b>Subscale Scores<sup>**</sup></b>               |                    |                    |                  |
| Sleep/ Energy(Q1-5, 7)                            | 74.0 ± 20.7        | 87.0 ± 15.0        | 0.0001           |
| Bother/ Concern (Q6, Q8-12)                       | 72.4 ± 25.7        | 83.7 ± 21.2        | 0.0028           |

Subjective symptoms were evaluated using the scores of the Nocturia Quality of Life (N-QoL) questionnaire [15-17].

\* The scores ranges of each Question exception Q13 are from 0 to 4. The score of Q13 is from 0 to 10.

Converted overall score(0-100)=100 × total converted scores(Q1-12)/4 × question numbers, converted score=4-each raw score.

\*\* Subscale score(0-10)=100 × total converted scores/4 × question numbers.

\*\*\* Statistical significance was determined by the Wilcoxon signed-rank test.
